# Supplementary material for: Bidirectional photoswitching of magnetic properties at room temperature: ligand-driven light-induced valence tautomerism
Source: Royal Society of Chemistry journal article supplement (doi:10.1039/c5sc00130g), 2015-01-01
Supplement: c5sc00130g1.pdf [file c5sc00130g1.pdf]

Electronic Supplementary Information (ESI)

**Bidirectional Photoswitching of Magnetic Properties at Room Temperature:  
Ligand-Driven Light-Induced Valence Tautomerism**

Alexander Witt, Frank W. Heinemann, and Marat M. Khusniyarov\*

*Friedrich-Alexander-University of Erlangen-Nuremberg*

*Department of Chemistry and Pharmacy*

*Egerlandstr. 1, 91058 Erlangen*

*Germany*

\*e-mail: marat.khusniyarov@fau.de

## Evaluation of variable-temperature data

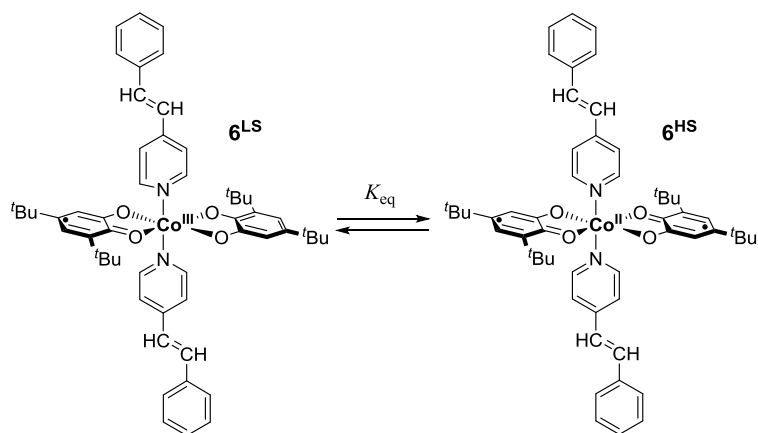

**Scheme S1.** Valence tautomeric (VT) equilibrium between redox isomers *trans*-**6**<sup>LS</sup> and *trans*-**6**<sup>HS</sup>.

Variable-temperature magnetic susceptibility data and variable-temperature electronic absorption spectra for *trans*-**6** and *cis*-**6** were fitted using expressions eq. (2) and eq. (3), respectively, derived from the van't Hoff equation eq. (1). The following quantities are used: equilibrium constant  $K_{\text{eq}}$  (Scheme S1), enthalpy change  $\Delta H$  and entropy change  $\Delta S$  for the equilibrium reaction, observed effective magnetic moment  $\mu_{\text{eff}}$ , the high- and low-temperature limits of magnetic moment  $\mu_{\text{eff}}(\text{HT})$  and  $\mu_{\text{eff}}(\text{LT})$ , respectively, observed absorption  $A_{\text{obs}}$ , the high- and low-temperature limits of absorption  $A(\text{HT})$  and  $A(\text{LT})$ .

$$\ln K_{\text{eq}} = -\frac{\Delta H}{RT} + \frac{\Delta S}{R} \quad (1)$$

$$\mu_{\text{eff}} = \sqrt{\frac{e^{\left(\frac{\Delta H}{RT} + \frac{\Delta S}{R}\right)} \mu_{\text{eff}}^2(\text{HT}) + \mu_{\text{eff}}^2(\text{LT})}{e^{\left(\frac{\Delta H}{RT} + \frac{\Delta S}{R}\right)} + 1}} \quad (2)$$

$$A_{\text{obs}} = \frac{e^{\left(\frac{\Delta H}{RT} + \frac{\Delta S}{R}\right)} A(\text{HT}) + A(\text{LT})}{e^{\left(\frac{\Delta H}{RT} + \frac{\Delta S}{R}\right)} + 1} \quad (3)$$

## Titration with 4-styppy and derivation of fitting functions

In ligand titration experiments monitored by the Evans  $^1\text{H}$  NMR method, the outer and inner tubes contained solutions with equal amounts of added ligand. The diamagnetic corrections for *trans*-**6** as well as *cis*-**6** were determined from Pascal's constants ( $\chi_{\text{dia}} = -5.45 \cdot 10^{-4} \text{ emu mol}^{-1}$ ).<sup>[1]</sup> Sample preparation and data collection were both performed under strictly anaerobic conditions. The following considerations are applied: **6** = *trans*-**6** or *cis*-**6**, **6<sup>LS</sup>** = *trans*-**6<sup>LS</sup>** or *cis*-**6<sup>LS</sup>**, **6<sup>HS</sup>** = *trans*-**6<sup>HS</sup>** or *cis*-**6<sup>HS</sup>**, and **5** = *trans*-**5** or *cis*-**5**.

We can reasonably assume that a solution of **6** at RT contains three cobalt species in equilibrium: a six-coordinate low-spin cobalt(III) species **6<sup>LS</sup>**, a six-coordinate high-spin cobalt(II) species **6<sup>HS</sup>**, and a five-coordinate high-spin cobalt(II) species **5** (eq. (4)). The presence of hypothetical four-coordinate species can be ruled out since they are not thermodynamically stable in solution and build tetramers,<sup>[2]</sup> which we did not observe.

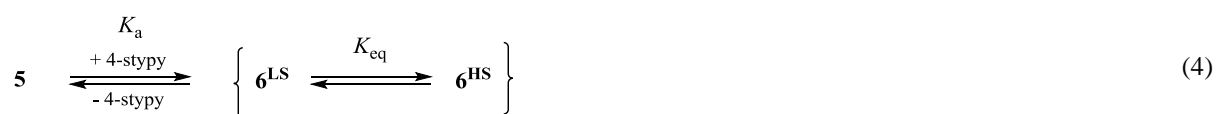

Upon addition of 4-styppy (*trans*- or *cis*-) to the appropriate complex solution the equilibrium is shifted towards the six-coordinate species **6<sup>LS</sup>** and **6<sup>HS</sup>** according to eq. (4).

The VT equilibrium between redox isomers **6<sup>LS</sup>** and **6<sup>HS</sup>** depends on temperature, however the ratio between the redox isomers remains constant at constant (room) temperature regardless of 4-styppy concentration (eq. (5)).

$$\left. \frac{[\mathbf{6}^{\text{HS}}]}{[\mathbf{6}^{\text{LS}}]} \right|_{T=\text{const.}} = K_{\text{eq}} \quad (5)$$

Therefore, **6<sup>LS</sup>** and **6<sup>HS</sup>** can be taken as a six-coordinate pseudo-species **6**  $\equiv \{\mathbf{6}^{\text{HS}} \leftrightarrow \mathbf{6}^{\text{LS}}\}$ , the concentration of which is increased upon titration with 4-styppy. This assumption is strongly supported by the observation of an isosbestic point in a series of electronic spectra upon titration. The association constant  $K_a$  is defined as:

$$K_a = \frac{[\mathbf{6}]}{[\mathbf{5}] \cdot [\text{L}]} \quad (6)$$

, where L = 4-styppy.

Then the total concentration of cobalt species  $[\text{Co}]_t$  (**6** + **5**) and 4-styppy ligand  $[\text{L}]_t$  (associated + dissociated) can be expressed as:

$$[\mathbf{6}] + [\mathbf{5}] = [\text{Co}]_t \quad (7)$$

$$[\mathbf{6}] + [\text{L}] = [\text{L}]_t \quad (8)$$

By substituting  $[\mathbf{5}]$  and  $[\text{L}]$  in eq. (6) with eq. (7) and eq. (8), we obtain

$$K_a = \frac{[\mathbf{6}]}{([\text{Co}]_t - [\mathbf{6}]) \cdot ([\text{L}]_t - [\mathbf{6}])} \quad (9)$$

Given the observed (total) *molar* magnetic susceptibility of solution,  $\chi_{\text{obs}}$ , is the *weighted* sum of the molar magnetic susceptibilities of five-coordinate species **5**,  $\chi(\mathbf{5})$ , and six-coordinate quasi-species **6**,  $\chi(\mathbf{6})$ , which is composed of  $\chi(\mathbf{6}^{\text{LS}})$  and  $\chi(\mathbf{6}^{\text{HS}})$ ,  $\chi_{\text{obs}}$  can be expressed as

$$\chi_{\text{obs}} = \chi(\mathbf{6}) \frac{[\mathbf{6}]}{[\text{Co}]_t} + \chi(\mathbf{5}) \left( 1 - \frac{[\mathbf{6}]}{[\text{Co}]_t} \right) = \frac{[\mathbf{6}]}{[\text{Co}]_t} (\chi(\mathbf{6}) - \chi(\mathbf{5})) + \chi(\mathbf{5}) \quad (10)$$

Eq. (10) can be solved and substituted for  $[\mathbf{6}]$  in eq. (9) to give the final eq. (11) that was used to fit the magnetic susceptibility of solution  $\chi_{\text{obs}}$  as a function of ligand concentration  $[\text{L}]_t$ .

$$\chi_{\text{obs}} = \frac{(\chi(\mathbf{5}) - \chi(\mathbf{6})) \sqrt{[\text{Co}]_t^2 K_a^2 - 2[\text{Co}]_t K_a^2 [\text{L}]_t + 2[\text{Co}]_t K_a + K_a^2 [\text{L}]_t^2 + 2K_a [\text{L}]_t + 1} - [\text{Co}]_t \chi(\mathbf{5}) K_a - [\text{Co}]_t \chi(\mathbf{6}) K_a + \chi(\mathbf{5}) K_a [\text{L}]_t - \chi(\mathbf{6}) K_a [\text{L}]_t + \chi(\mathbf{5}) - \chi(\mathbf{6})}{2[\text{Co}]_t K_a} \quad (11)$$

Similarly, the dependence of the 750 nm absorption band on the amount of added 4-*stypy* ligand can be derived:

Since free 4-*stypy* does not contribute to the absorption at 750 nm, the observed (total) absorption,  $A_{\text{obs}}$ , is the sum of the respective absorptions of **5**,  $\mathbf{6}^{\text{HS}}$ , and  $\mathbf{6}^{\text{LS}}$ . Since the temperature was kept constant, the ratio between  $\mathbf{6}^{\text{HS}}$  and  $\mathbf{6}^{\text{LS}}$  remains unchanged during titration. Hence, the shift in the equilibrium between **5** and a quasi-species  $\mathbf{6} \equiv \{\mathbf{6}^{\text{HS}} \leftrightarrow \mathbf{6}^{\text{LS}}\}$  can be described with molar extinction coefficients  $\varepsilon(\mathbf{5})$  and  $\varepsilon(\mathbf{6})$  respectively:

$$A_{\text{obs}} = \varepsilon(\mathbf{6})[\mathbf{6}] + \varepsilon(\mathbf{5})[\mathbf{5}] = \varepsilon(\mathbf{5})([\text{Co}]_t - [\mathbf{5}]) + \varepsilon(\mathbf{6})[\mathbf{6}] = [\mathbf{6}](\varepsilon(\mathbf{6}) - \varepsilon(\mathbf{5})) + \varepsilon(\mathbf{5})[\text{Co}]_t \quad (12)$$

Eq. (12) can be solved and substituted for  $[\mathbf{6}]$  in eq. (9) to yield the final eq. (13) that was used to fit the absorption at 750 nm,  $A_{\text{obs}}$ , as a function of ligand concentration  $[\text{L}]_t$ :

$$A_{\text{obs}} = \frac{(\varepsilon(\mathbf{5}) - \varepsilon(\mathbf{6})) \sqrt{[\text{Co}]_t^2 K_a^2 - 2[\text{Co}]_t K_a^2 [\text{L}]_t + 2[\text{Co}]_t K_a + K_a^2 [\text{L}]_t^2 + 2K_a [\text{L}]_t + 1} + [\text{Co}]_t \varepsilon(\mathbf{5}) K_a + [\text{Co}]_t \varepsilon(\mathbf{6}) K_a - \varepsilon(\mathbf{5}) K_a [\text{L}]_t + \varepsilon(\mathbf{6}) K_a [\text{L}]_t - \varepsilon(\mathbf{5}) + \varepsilon(\mathbf{6})}{2K_a} \quad (13)$$

The degree of dissociation defined as

$$\alpha = 100\% \frac{[\mathbf{5}]}{[\mathbf{5}] + [\mathbf{6}]} \quad (14)$$

can be easily calculated via

$$\alpha = 100\% \cdot \frac{-1 + \sqrt{1 + 4K_a [\text{Co}]_t}}{2K_a [\text{Co}]_t} \quad (15)$$

## Figures and tables

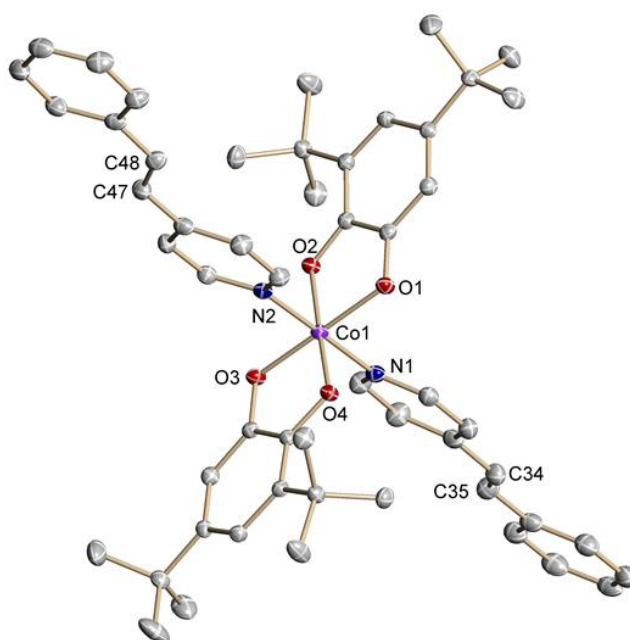

**Figure S1.** Molecular structure of *trans*-6 determined at 120 K. Thermal ellipsoids are drawn at 50 % probability. Hydrogen atoms are omitted for clarity.

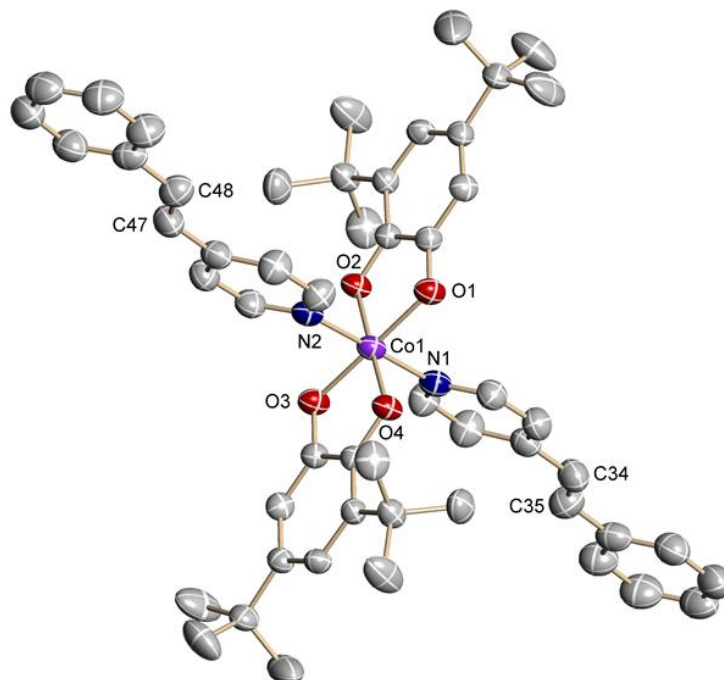

**Figure S2.** Molecular structure of *trans*-6 determined at 295 K. Thermal ellipsoids are drawn at 50 % probability. Hydrogen atoms are omitted for clarity.

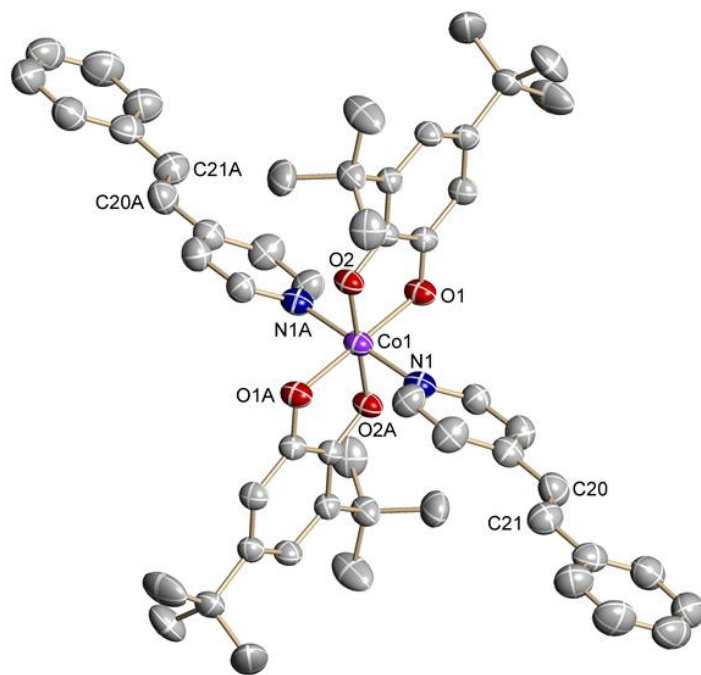

**Figure S3.** Molecular structure of *trans*-**6** determined at 305 K. Thermal ellipsoids are drawn at 50 % probability. Hydrogen atoms are omitted for clarity.

**Table S1.** Selected bond lengths [Å] of *trans*-**6** determined by X-ray crystallography at 120 and 295 K.

|         | 120 K    | 295 K    |
|---------|----------|----------|
| Co1–N1  | 1.938(1) | 1.933(5) |
| Co1–N2  | 1.945(1) | 1.925(5) |
| Co1–O1  | 1.910(1) | 1.904(1) |
| Co1–O2  | 1.916(1) | 1.902(1) |
| Co1–O3  | 1.863(1) | 1.867(1) |
| Co1–O4  | 1.854(1) | 1.867(1) |
| C1–O1   | 1.300(2) | 1.304(2) |
| C6–O2   | 1.297(2) | 1.298(2) |
| C15–O3  | 1.349(2) | 1.342(2) |
| C20–O4  | 1.354(2) | 1.342(2) |
| C1–C6   | 1.443(2) | 1.444(2) |
| C1–C2   | 1.409(2) | 1.400(2) |
| C2–C3   | 1.373(2) | 1.371(2) |
| C3–C4   | 1.431(2) | 1.425(2) |
| C4–C5   | 1.372(2) | 1.371(2) |
| C5–C6   | 1.435(2) | 1.425(2) |
| C15–C20 | 1.412(2) | 1.415(2) |
| C15–C16 | 1.390(2) | 1.385(2) |
| C16–C17 | 1.397(2) | 1.388(2) |
| C17–C18 | 1.393(2) | 1.402(2) |
| C18–C19 | 1.405(2) | 1.392(2) |
| C19–C20 | 1.400(2) | 1.406(2) |

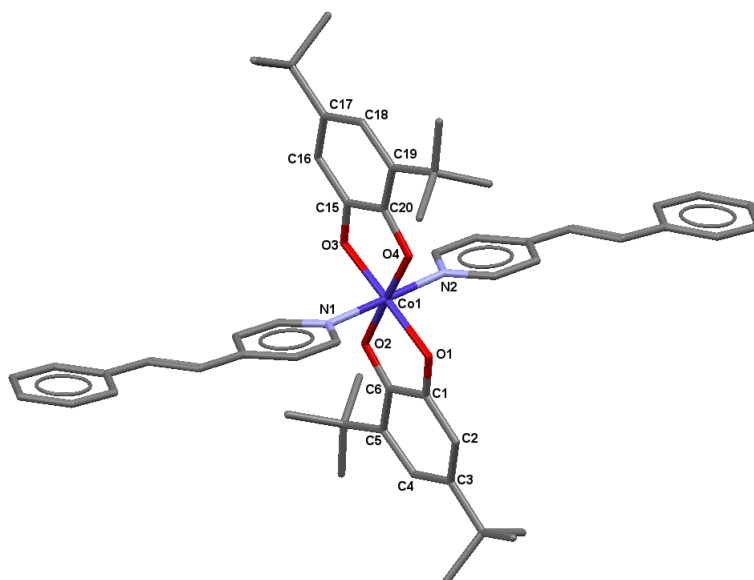

**Table S2.** Selected bond lengths [Å] of *trans*-**6** determined by X-ray crystallography at 305 K.

|        | 305 K    |
|--------|----------|
| Co1–N1 | 1.912(5) |
| Co1–O1 | 1.886(1) |
| Co1–O2 | 1.887(1) |
| C1–O1  | 1.324(2) |
| C6–O2  | 1.323(2) |
| C1–C6  | 1.426(2) |
| C1–C2  | 1.394(2) |
| C2–C3  | 1.382(2) |
| C3–C4  | 1.409(2) |
| C4–C5  | 1.382(2) |
| C5–C6  | 1.416(2) |

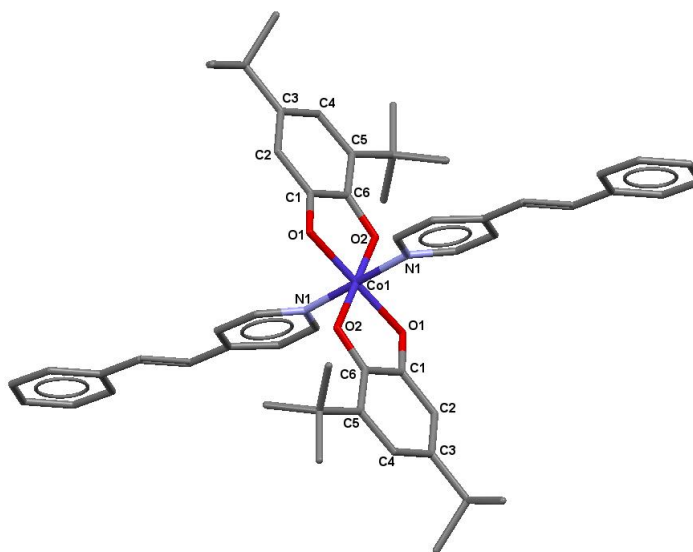

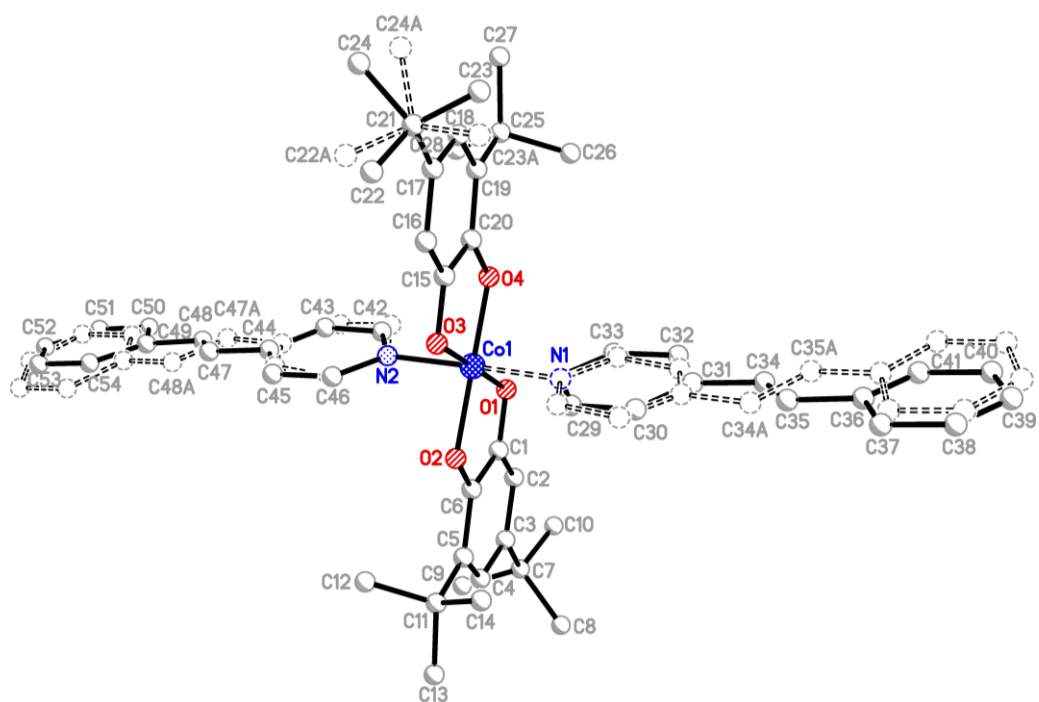

**Figure S4.** Two alternative orientations of *trans*-4-styryl ligands in *trans*-6 at 295 K featuring inverted orientations of the ethylene bond. Refinement resulted in site occupancies of 85.4(3) and 14.6(3) % of the 50 involved atoms.

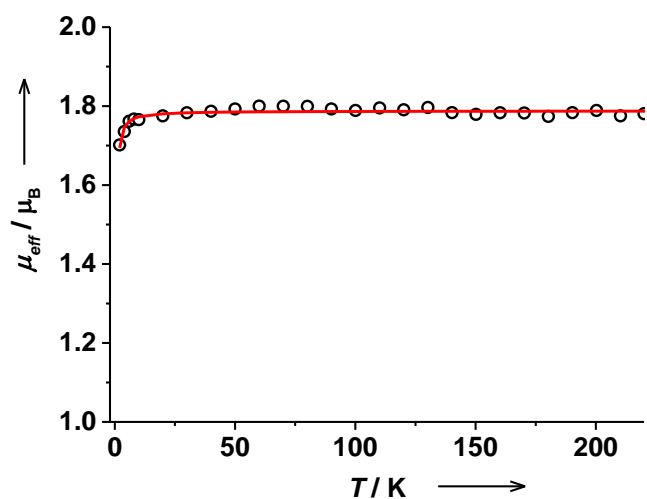

**Figure S5.** Temperature dependent effective magnetic moment measured on a microcrystalline sample of *trans*-6 at external magnetic field of 1 T. Low temperature region is shown. Fit parameters for data points in the range 2 – 220 K:  $S = 1/2$ ,  $g = 2.064$ ,  $\Theta = -0.15$  K.



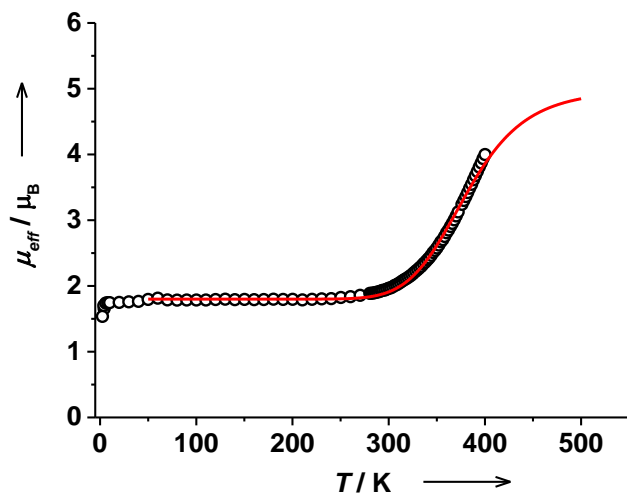

**Figure S6.** Temperature dependent effective magnetic moment measured on a microcrystalline sample of *trans*-**6** at external magnetic field of 1 T. Van't Hoff fit parameters: enthalpy change  $\Delta H = 41(1) \text{ kJ mol}^{-1}$ , entropy change  $\Delta S = 104(3) \text{ J mol}^{-1} \text{ K}^{-1}$ ; low-temperature effective magnetic moment  $\mu_{\text{eff}}(\text{LT}) = 1.80(1) \mu_{\text{B}}$ . The high-temperature magnetic moment  $\mu_{\text{eff}}(\text{HT})$  was fixed at  $5.0 \mu_{\text{B}}$ . Estimated transition temperature:  $T_{1/2} = 394 \text{ K}$ .

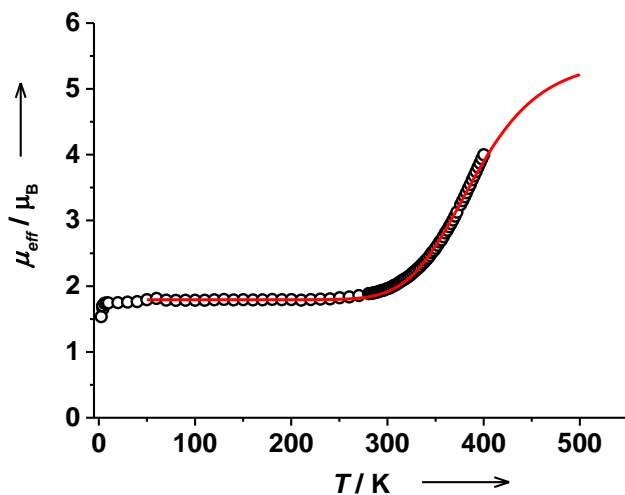

**Figure S7.** Temperature dependent effective magnetic moment measured on a microcrystalline sample of *trans*-**6** at external magnetic field of 1 T. Alternative van't Hoff fit:  $\Delta H = 38(1) \text{ kJ mol}^{-1}$ ,  $\Delta S = 94(2) \text{ J mol}^{-1} \text{ K}^{-1}$ ; low-temperature effective magnetic moment:  $\mu_{\text{eff}}(\text{LT}) = 1.79(1) \mu_{\text{B}}$ . The high-temperature magnetic moment  $\mu_{\text{eff}}(\text{HT})$  was fixed at  $5.5 \mu_{\text{B}}$ . Estimated transition temperature:  $T_{1/2} = 404 \text{ K}$ .

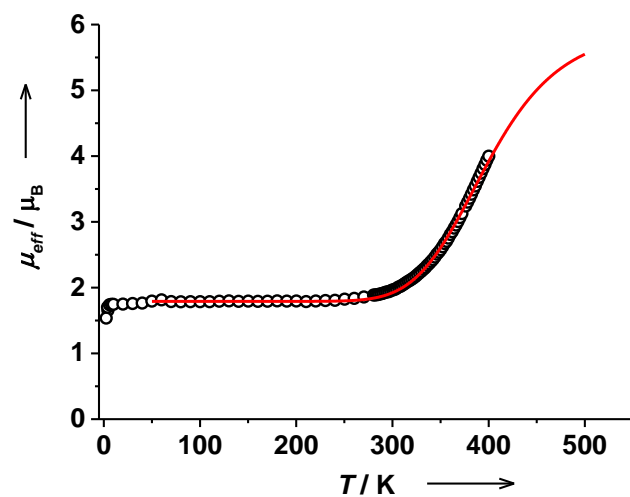

**Figure S8.** Temperature dependent effective magnetic moment measured on a microcrystalline sample of *trans*-**6** at external magnetic field of 1 T. Alternative van't Hoff fit:  $\Delta H = 37(1) \text{ kJ mol}^{-1}$ ,  $\Delta S = 87(2) \text{ J mol}^{-1} \text{ K}^{-1}$ ; low-temperature effective magnetic moment:  $\mu_{\text{eff}}(\text{LT}) = 1.79(1) \mu_{\text{B}}$ . The high-temperature magnetic moment  $\mu_{\text{eff}}(\text{HT})$  was fixed at  $6.0 \mu_{\text{B}}$ . Estimated transition temperature:  $T_{1/2} = 425 \text{ K}$ .

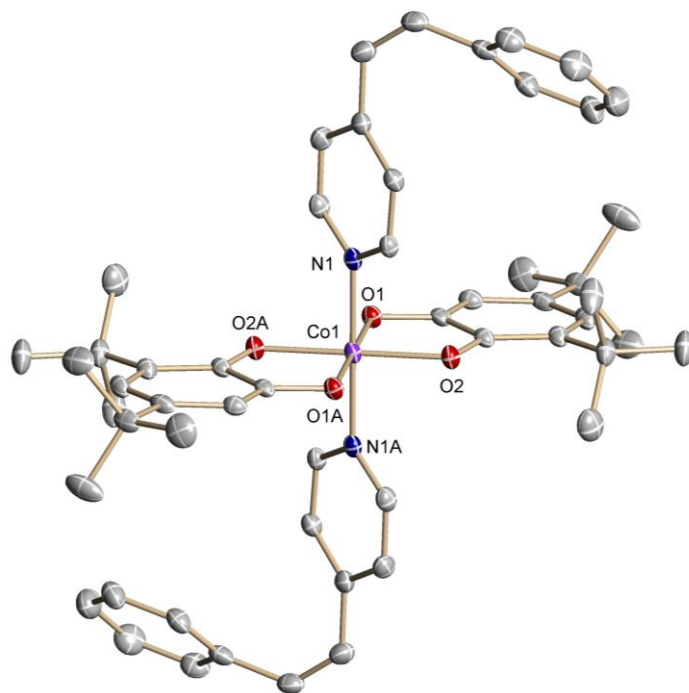

**Figure S9.** Molecular structure of *cis-6* determined at 100 K. Thermal ellipsoids are drawn at 50 % probability. Hydrogen atoms are omitted for clarity.

**Table S3.** Selected bond lengths [Å] of *cis-6* determined by X-ray crystallography at 100 K.

|        | 100 K    |
|--------|----------|
| Co1–N1 | 1.940(1) |
| Co1–O1 | 1.885(1) |
| Co1–O2 | 1.878(1) |
| C1–O1  | 1.326(2) |
| C6–O2  | 1.326(2) |
| C1–C6  | 1.427(2) |
| C1–C2  | 1.403(2) |
| C2–C3  | 1.385(2) |
| C3–C4  | 1.414(2) |
| C4–C5  | 1.392(2) |
| C5–C6  | 1.418(2) |

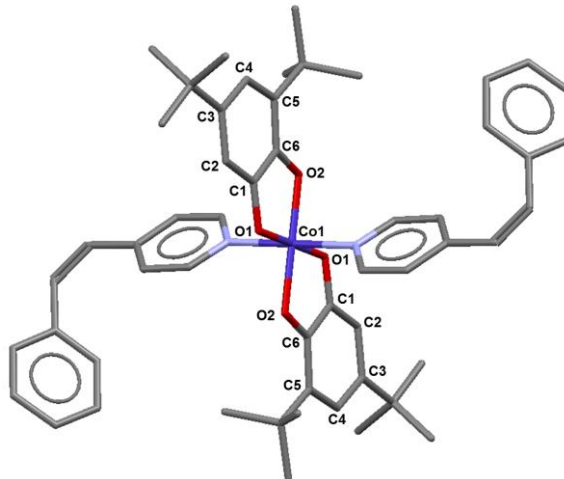

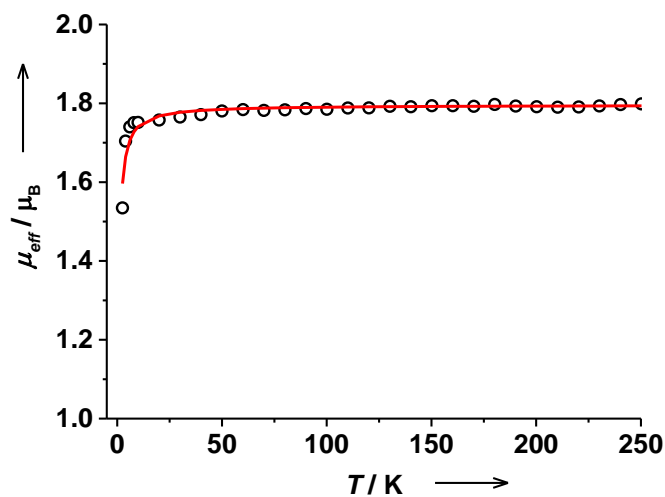

**Figure S10.** Temperature dependent effective magnetic moment measured on a microcrystalline sample of *cis-6* at external magnetic field of 1 T. Low temperature region is shown. Fit parameters for data points in the range 2 – 250 K:  $S = 1/2$ ,  $g = 2.073$ ,  $\Theta = -0.62$  K.

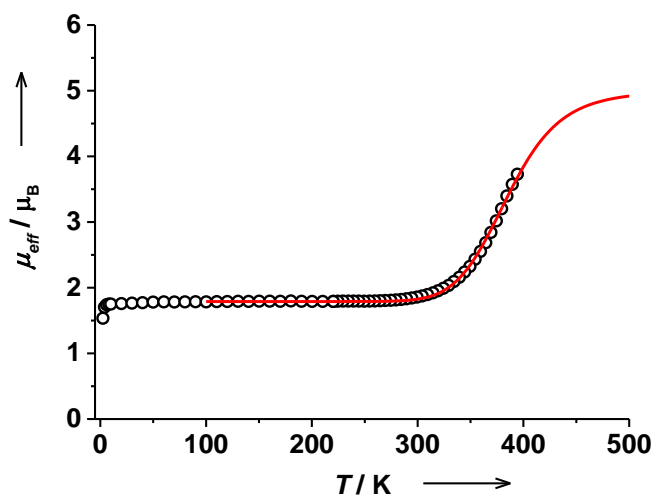

**Figure S11.** Temperature dependent effective magnetic moment measured on a microcrystalline sample of *cis-6* at external magnetic field of 1 T. Van't Hoff fit parameters: enthalpy change  $\Delta H = 52(2)$  kJ mol<sup>-1</sup>, entropy change  $\Delta S = 131(3)$  J mol<sup>-1</sup> K<sup>-1</sup>; low-temperature effective magnetic moment  $\mu_{\text{eff}}(\text{LT}) = 1.79(1)$   $\mu_{\text{B}}$ . The high-temperature magnetic moment  $\mu_{\text{eff}}(\text{HT})$  was fixed at 5.0  $\mu_{\text{B}}$ . Estimated transition temperature:  $T_{1/2} = 397$  K.

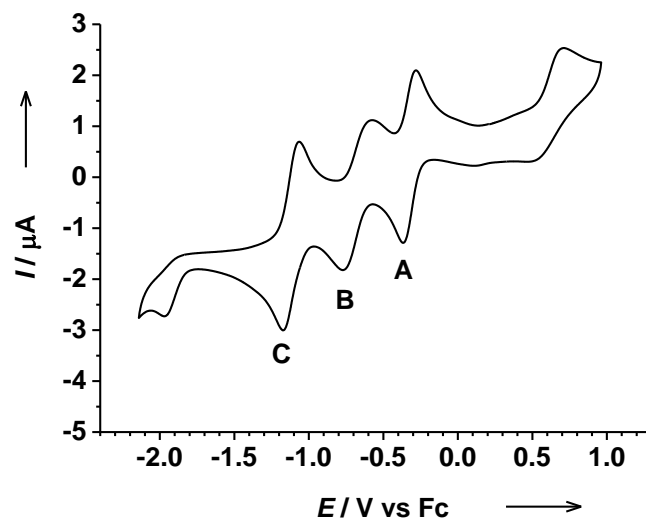

**Figure S12.** Cyclic voltammogram of *trans*-6 dissolved in CH<sub>2</sub>Cl<sub>2</sub> containing <sup>n</sup>Bu<sub>4</sub>NPF<sub>6</sub> (0.1 M) as supporting electrolyte (room temperature, scan rate 25 mV s<sup>-1</sup>).

**Table S4.** Electrochemical data for *trans*-6 dissolved in dichloromethane obtained from a cyclic voltammogram recorded at room temperature at a scan rate 25 mV s<sup>-1</sup>. All potentials are referenced versus the Fc/Fc<sup>+</sup> couple.

| redox process | $E_{pc}$ , V | $E_{pa}$ , V | $ \Delta E_p $ , V | $E_{1/2}$ , V | $i_{pc}$ , $\mu A$ | $i_{pa}$ , $\mu A$ | $ i_{pc} / i_{pa} $ |
|---------------|--------------|--------------|--------------------|---------------|--------------------|--------------------|---------------------|
| A             | -0.28        | -0.37        | 0.09               | -0.33         | +1.32              | -1.60              | 0.83                |
| B             | -0.57        | -0.77        | 0.20               | -0.67         | +1.17              | -1.24              | 0.94                |
| C             | -1.06        | -1.17        | 0.11               | -1.12         | +1.85              | -1.65              | 1.12                |

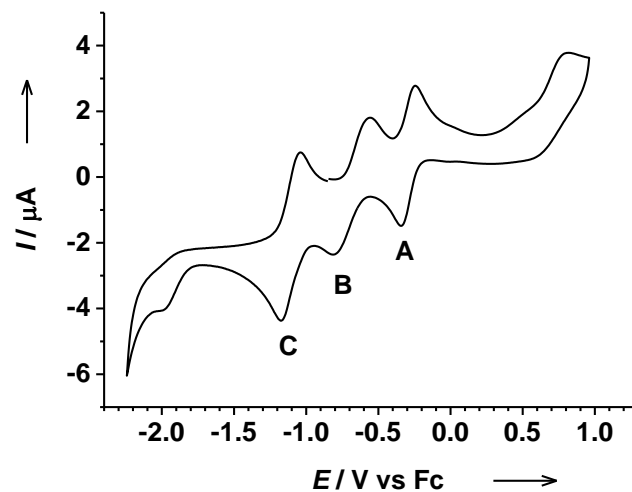

**Figure S13.** Cyclic voltammogram of *cis*-6 dissolved in CH<sub>2</sub>Cl<sub>2</sub> containing <sup>n</sup>Bu<sub>4</sub>NPF<sub>6</sub> (0.1 M) as supporting electrolyte (room temperature, scan rate 25 mV s<sup>-1</sup>).

**Table S5.** Electrochemical data for *cis*-6 dissolved in dichloromethane obtained from a cyclic voltammogram recorded at room temperature at a scan rate 25 mV s<sup>-1</sup>. All potentials are referenced versus the Fc/Fc<sup>+</sup> couple.

| redox process | $E_{pc}$ , V | $E_{pa}$ , V | $ \Delta E_p $ , V | $E_{1/2}$ , V | $i_{pc}$ , $\mu A$ | $i_{pa}$ , $\mu A$ | $ i_{pc} / i_{pa} $ |
|---------------|--------------|--------------|--------------------|---------------|--------------------|--------------------|---------------------|
| A             | -0.24        | -0.34        | 0.10               | -0.29         | +1.39              | -1.63              | 0.85                |
| B             | -0.56        | -0.81        | 0.25               | -0.69         | +1.22              | -1.27              | 0.96                |
| C             | -1.04        | -1.17        | 0.13               | -1.11         | +1.89              | -1.80              | 1.05                |

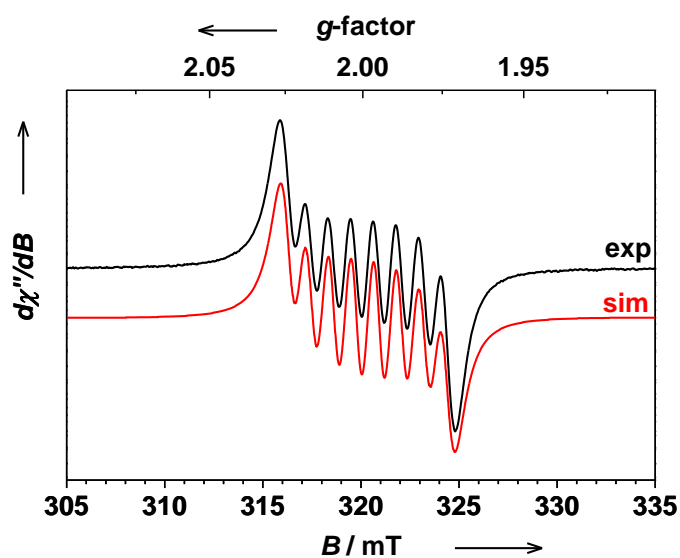

**Figure S14.** X-band EPR spectrum of *trans*-6 in CH<sub>2</sub>Cl<sub>2</sub> ( $c = 1.2 \times 10^{-3}$  M) recorded at room temperature (frequency: 8.9587 GHz; modulation: 0.4 mT; power: 1.0 mW). Fit parameters:  $g_{\text{iso}} = 1.9980$ ,  $A_{\text{iso}}(^{59}\text{Co}, I = 7/2) = 1.07 \times 10^{-3}$  cm<sup>-1</sup>. Experimental spectrum is depicted by the black trace and simulation is shown in red.

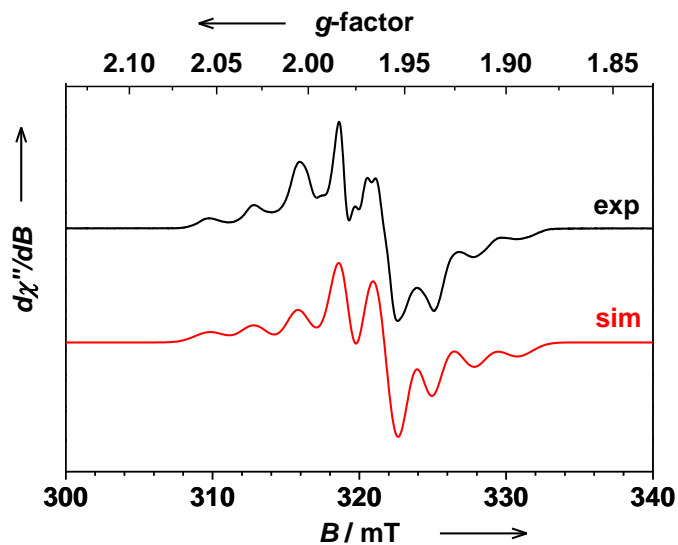

**Figure S15.** X-band EPR spectrum of *trans*-6 dissolved in toluene and recorded at 14 K (frequency: 8.9760 GHz; modulation: 0.5 mT; power: 1.0 mW). Fit parameters:  $g = (1.9887, 2.0022, 2.0051)$ ,  $A(^{59}\text{Co}, I = 7/2) = (0.4, 28.1, 3.9) \times 10^{-4}$  cm<sup>-1</sup>. Experimental spectrum is depicted by the black trace and simulation is shown in red.

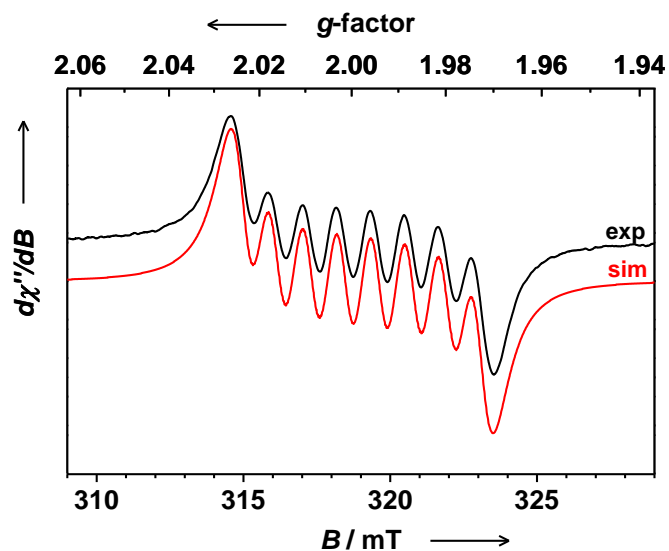

**Figure S16.** X-band EPR spectrum of *cis*-**6** in  $\text{CH}_2\text{Cl}_2$  ( $c = 1.0 \times 10^{-4} \text{ M}$ ) recorded at room temperature (frequency: 8.921 GHz; modulation: 0.4 mT; power: 0.1 mW). Fit parameters:  $g_{\text{iso}} = 1.9978$ ,  $A_{\text{iso}}(^{59}\text{Co}, I = 7/2) = 6.66 \times 10^{-3} \text{ cm}^{-1}$ . Experimental spectrum is depicted by the black trace and simulation is shown in red.

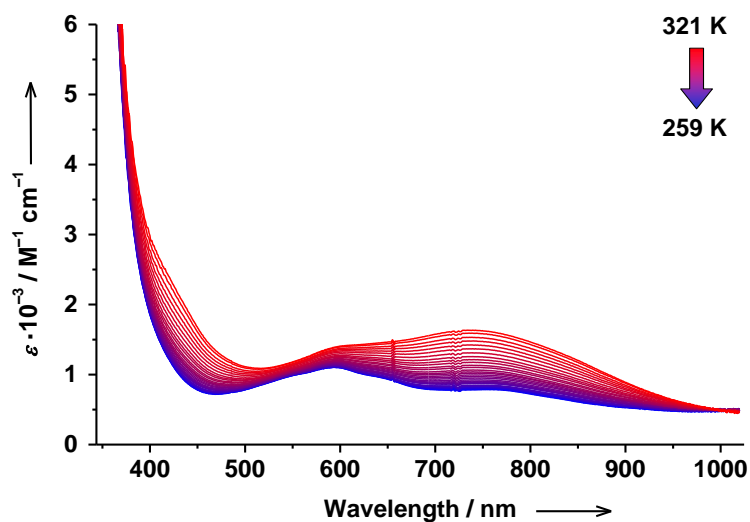

**Figure S17.** Temperature dependent electronic absorption spectrum of *trans*-**6** dissolved in toluene containing 12 eq of *trans*-4-styrylpyridine.

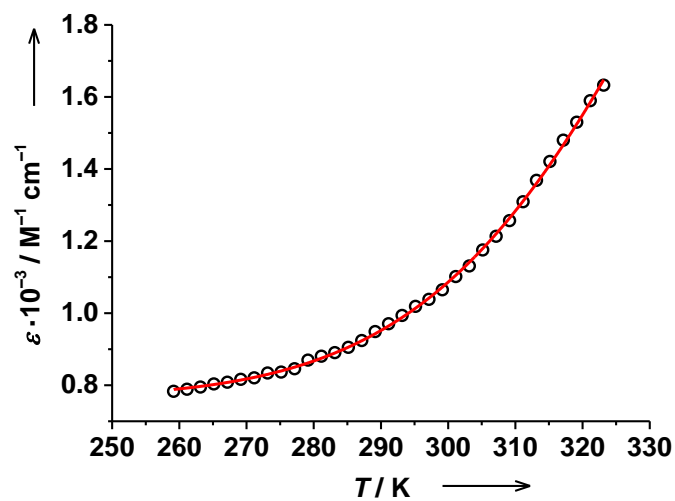

**Figure S18.** Temperature dependence of the 750 nm absorption band of *trans*-**6** in toluene solution containing 12 eq of *trans*-4-styrylpyridine. Van't Hoff fit parameters:  $\Delta H = 39(2) \text{ kJ mol}^{-1}$ ,  $\Delta S = 108(9) \text{ J mol}^{-1} \text{ K}^{-1}$ ; low- and high-temperature molar extinction coefficients:  $\epsilon(\text{LT}) = 0.781(7) \times 10^3 \text{ M}^{-1} \text{ cm}^{-1}$  and  $\epsilon(\text{HT}) = 6(1) \times 10^3 \text{ M}^{-1} \text{ cm}^{-1}$ . Estimated transition temperature:  $T_{1/2} = 361 \text{ K}$ .

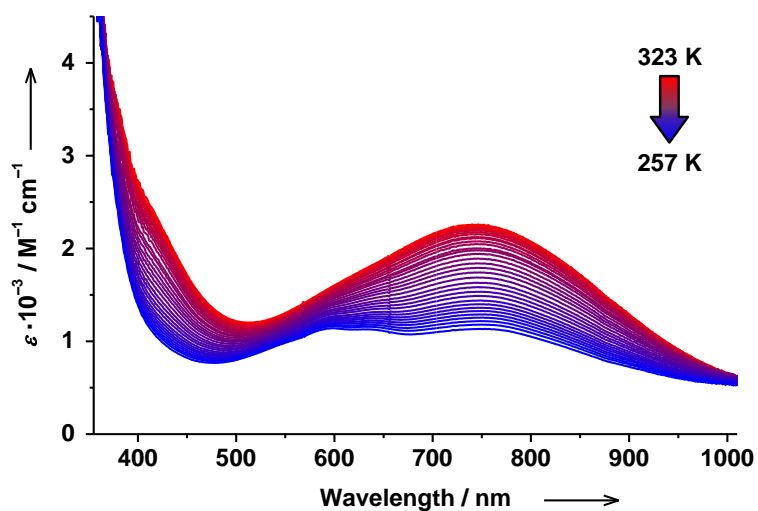

**Figure S19.** Temperature dependent electronic absorption spectrum of *cis*-**6** dissolved in toluene.



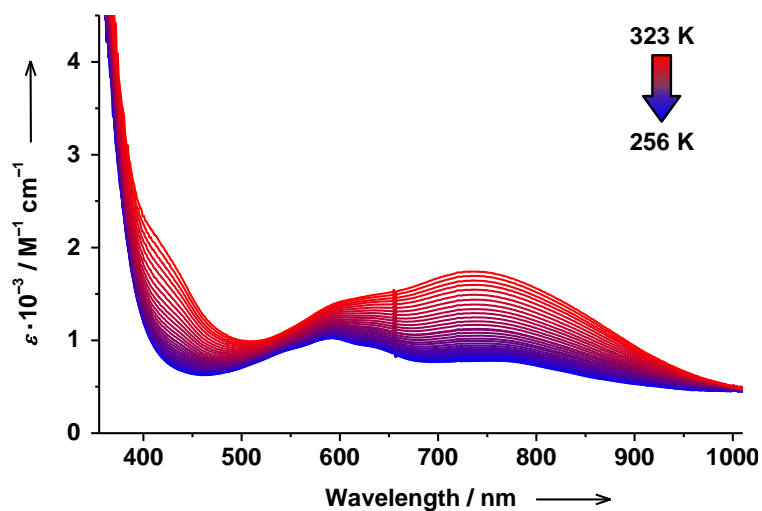

**Figure S20.** Temperature dependent electronic absorption spectrum of *cis*-6 dissolved in toluene containing 20 eq of *cis*-4-styrylpyridine.

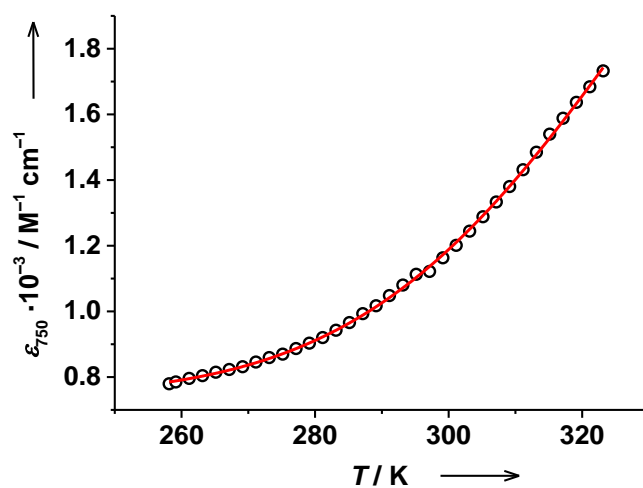

**Figure S21.** Temperature dependence of the 750 nm absorption band of *cis*-6 in toluene solution containing 20 eq of *cis*-4-styrylpyridine. Van't Hoff fit parameters:  $\Delta H = 37(2) \text{ kJ mol}^{-1}$ ,  $\Delta S = 110(7) \text{ J mol}^{-1} \text{ K}^{-1}$ ; low- and high-temperature molar extinction coefficients:  $\epsilon(\text{LT}) = 0.738(8) \times 10^3 \text{ M}^{-1} \text{ cm}^{-1}$  and  $\epsilon(\text{HT}) = 3.6(2) \times 10^3 \text{ M}^{-1} \text{ cm}^{-1}$ . Estimated transition temperature:  $T_{1/2} = 336 \text{ K}$ .

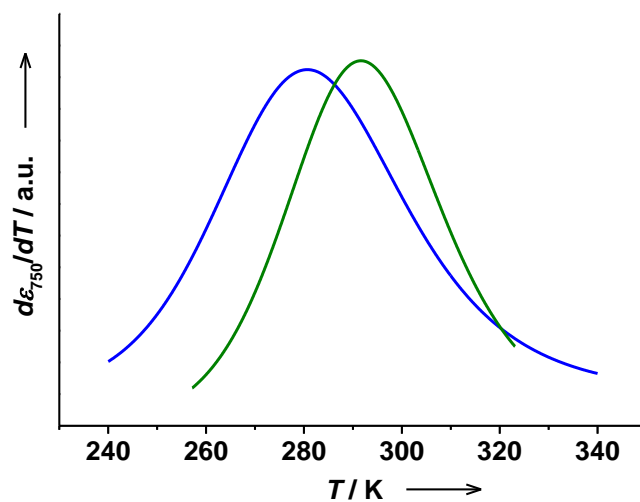

**Figure S22.** First derivatives of the van't Hoff fitting curves for the temperature dependence of the 750 nm band for *trans*-**6** (green) and *cis*-**6** (blue) solutions (for original data see Figure 6 in the main text). Transition temperature  $T_{1/2}$  determined by curve maximum is clearly lower for *cis*-**6** (283 K) than for *trans*-**6** (295 K).

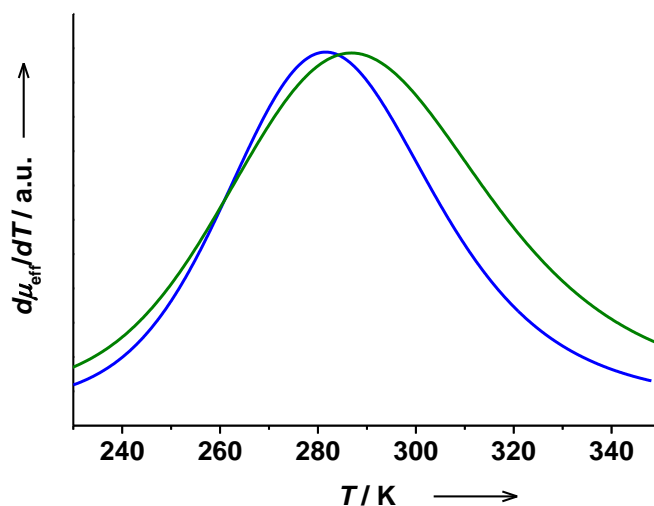

**Figure S23.** First derivatives of the van't Hoff fitting curves for the temperature dependence of the effective magnetic moment for *trans*-**6** (green) and *cis*-**6** (blue) solutions (for original data see Figures 3 and 4 in the main text). Transition temperature  $T_{1/2}$  determined by curve maximum is clearly lower for *cis*-**6** (288 K) than for *trans*-**6** (299 K).

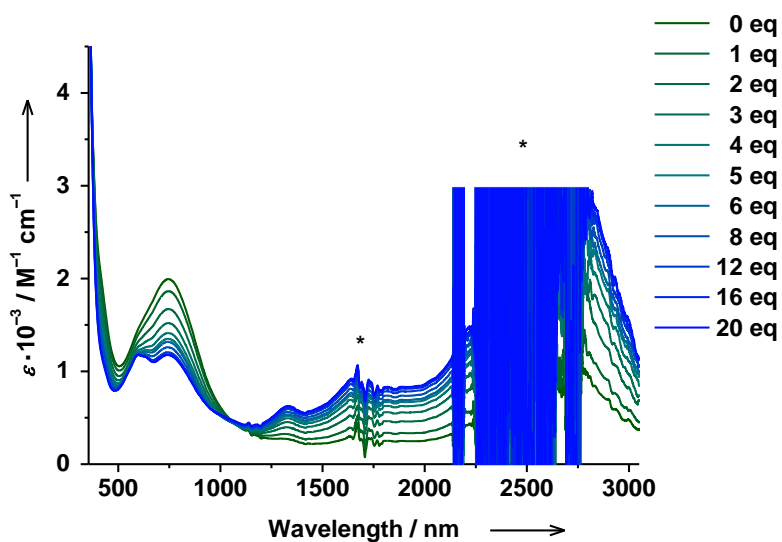

**Figure S24.** Changes in absorption spectrum of *cis-6* dissolved in toluene upon titration with *cis-4*-styrylpyridine at room temperature. Signals marked with asterix (\*) are due to solvent or change of detector.

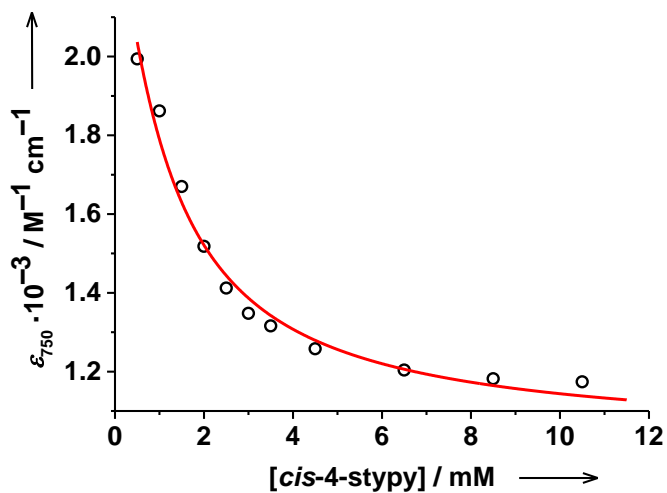

**Figure S25.** The evolution of the 750 nm absorption band of *cis-6* dissolved in toluene upon titration with *cis-4*-styrylpyridine at room temperature. Non-linear regression fit parameters:  $\epsilon(cis-6 \equiv \{cis-6^{HS} \leftrightarrow cis-6^{LS}\}) = 1.02(4) \times 10^3 \text{ M}^{-1} \text{ cm}^{-1}$ ,  $\epsilon(cis-5) = 2.4(1) \times 10^3 \text{ M}^{-1} \text{ cm}^{-1}$ ,  $K_a = 1.1(3) \times 10^3 \text{ L mol}^{-1}$ .

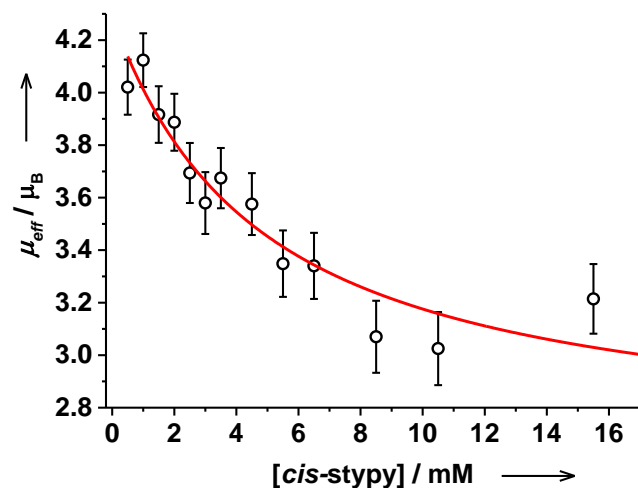

**Figure S26.** The evolution of the effective magnetic moment of *cis-6* dissolved in toluene upon titration with *cis-4*-styrylpyridine at room temperature. Non-linear regression fit parameters:  $\mu_{\text{eff}}(\text{cis-6}) \equiv \{\text{cis-6}^{\text{HS}} \leftrightarrow \text{cis-6}^{\text{LS}}\} = 2.4(1) \mu_{\text{B}}$ ,  $\mu_{\text{eff}}(\text{cis-5}) = 4.1(3) \mu_{\text{B}}$ ,  $K_{\text{a}} = 0.3(1) \times 10^3 \text{ L mol}^{-1}$ .

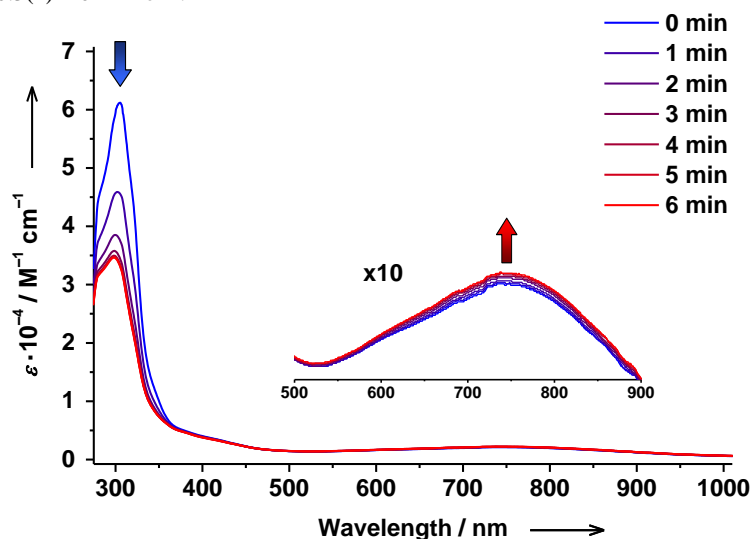

**Figure S27.** Changes in electronic absorption spectrum of a dilute toluene solution of *trans-6* upon UV irradiation at room temperature ( $c = 7.5 \times 10^{-5} \text{ M}$ ,  $\lambda = 320 \pm 8 \text{ nm}$ , 1000 W Xe lamp). The weak absorption at 750 nm is magnified.

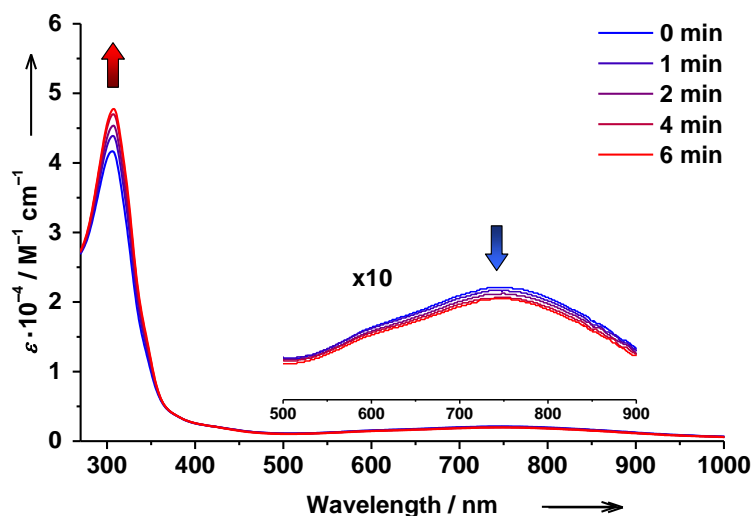

**Figure S28.** Changes in electronic absorption spectrum of a dilute benzene solution of *cis-6* upon UV irradiation at room temperature ( $c = 5.0 \times 10^{-4} \text{ M}$ ,  $\lambda = 272 \pm 8 \text{ nm}$ , 1000 W Xe lamp). The weak absorption at 750 nm is magnified.

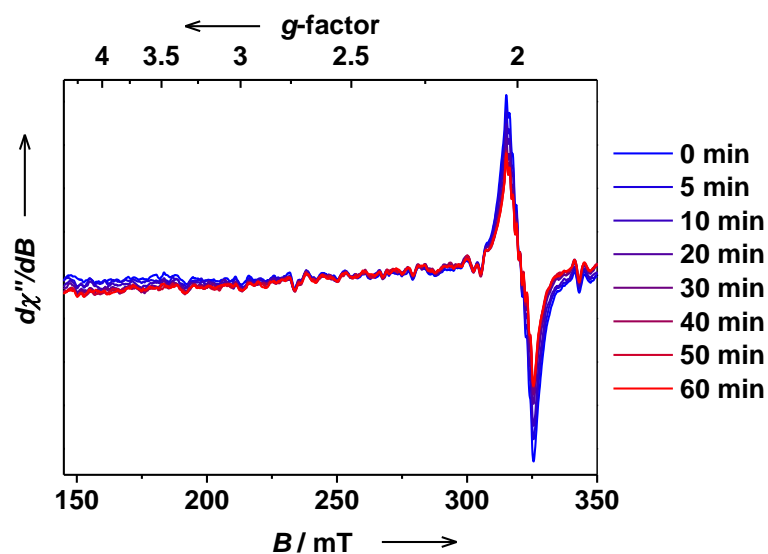

**Figure S29.** Changes in X-band EPR spectrum of *trans*-**6** dissolved in benzene upon UV irradiation at room temperature ( $c = 1.0 \times 10^{-4}$  M,  $\lambda = 323 \pm 5$  nm, 150 W Xe lamp). No new signals appeared upon irradiation.

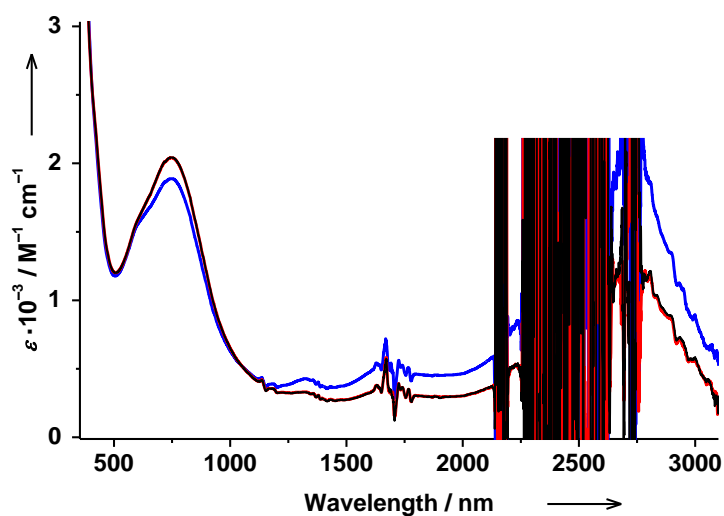

**Figure S30.** Thermal stability of photoinduced state: Electronic absorption spectra of *trans*-**6** dissolved in toluene ( $c = 3.7 \times 10^{-4}$  M, room temperature) before irradiation (blue), after UV irradiation (red,  $\lambda = 320 \pm 8$  nm, 1000 W Xe lamp), subsequently after 4 hours stored at room temperature (black).

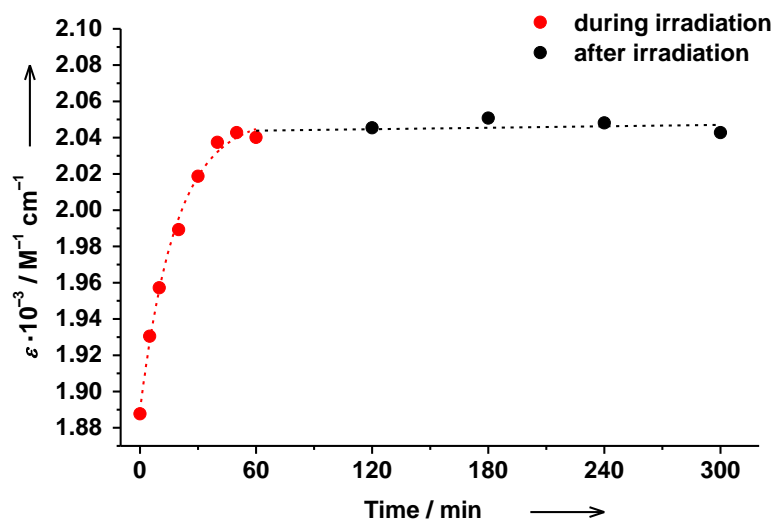

**Figure S31.** Thermal stability of photoinduced state: The evolution of the 750 nm absorption band of *trans*-**6** dissolved in toluene ( $c = 3.7 \times 10^{-4}$  M, room temperature) during UV irradiation (red,  $\lambda = 320 \pm 8$  nm, 1000 W Xe lamp) and after irradiation (black). Dashed lines serve as a guide to the eye.

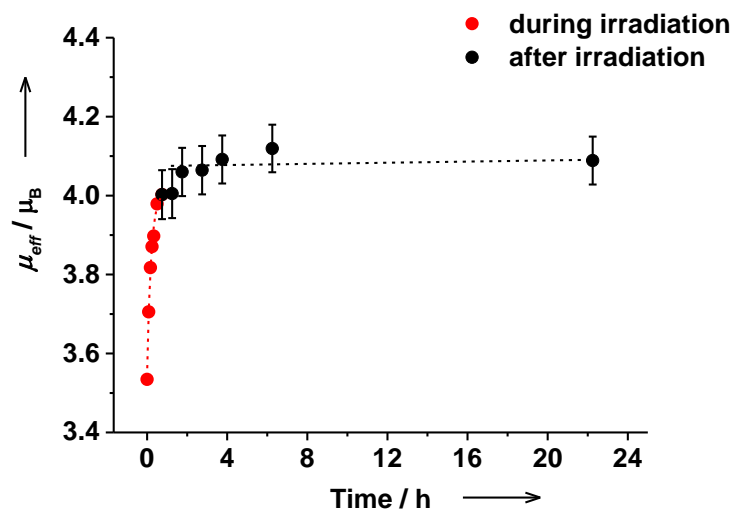

**Figure S32.** Thermal stability of photoinduced state: The evolution of the effective magnetic moment of *trans*-**6** dissolved in toluene during UV irradiation (red,  $\lambda = 320 \pm 8$  nm, 1000 W Xe lamp) and after irradiation (black) at room temperature determined by the Evans method ( $c = 5.0 \times 10^{-4}$  M, toluene/[D<sub>8</sub>]toluene/TMS = 10:2:1). Dashed lines serve as a guide to the eye.

## References

- [1] G. Bain, J. Berry, *J. Chem. Educ.* **2008**, *85*, 532.
- [2] R. Buchanan, B. Fitzgerald, C. Pierpont, *Inorg. Chem.* **1979**, *18*, 3439-3444.
